# The lupus autoantigen La is an *Xist*-binding RNA chaperone involved in *Xist* folding and cloud formation

Norbert Ha<sup>2,3</sup>, Nan Ding<sup>1,3</sup>, Ru Hong<sup>2</sup>, Rubing Liu<sup>2</sup>, Xavier Roca<sup>2</sup>, Yingyuan Luo<sup>1</sup>, Xiaowei Duan<sup>1</sup>, Xiao Wang<sup>1</sup>, Li-Feng Zhang<sup>2,4,\*</sup> & Lingyi Chen<sup>1,\*</sup>

<sup>1</sup>State Key Laboratory of Medicinal Chemical Biology, Collaborative Innovation Center for Biotherapy, Collaborative Innovation Center of Tianjin for Medical Epigenetics, Tianjin Key Laboratory of Protein Sciences, National Demonstration Center for Experimental Biology Education and College of Life Sciences, Nankai University, Tianjin 300071, China. <sup>2</sup>School of Biological Sciences, Nanyang Technological University, 60 Nanyang Drive, Singapore 637551. <sup>3</sup>These authors contributed equally to this work. <sup>4</sup>Current address, Choa Chu Kang, Singapore

**\*Correspondence:** Lingyi Chen, [lingyichen@nankai.edu.cn](mailto:lingyichen@nankai.edu.cn)  
Li-Feng Zhang, [ZLF02472@gmail.com](mailto:ZLF02472@gmail.com)

**Classification:** Biological Sciences, Developmental Biology

**Keywords:** La, Ssb, RNA chaperone, lncRNA in-cell structure, Xist, X chromosome inactivation.

**Author Contributions:** N.H., N.D., R.H., R.L., X.R., Y.L., X.D., and X.W. performed experiments, N.H., L-F.Z. and L.C. analyzed the data, L-F.Z. and L.C. designed the experiments and wrote the paper.

## ABSTRACT

Using the programmable RNA-sequence binding domain of the Pumilio protein, we FLAG-tagged *Xist* (inactivated X chromosome specific transcript) in live cells. Affinity pulldown coupled to mass spectrometry was employed to identify a list of 138 candidate *Xist*-binding proteins, from which, the lupus autoantigen La (encoding gene *Ssb*) was validated as a protein functionally critical for X chromosome inactivation (XCI). Extensive XCI defects were detected in *Ssb* knockdown cells, including chromatin compaction, death of female ES cells during *in vitro* differentiation and chromosome-wide monoallelic gene expression pattern. Live-cell imaging of *Xist* RNA reveals the defining XCI defect: *Xist* cloud formation. La is a ubiquitous and versatile RNA-binding protein with RNA chaperone activity. Functional dissection of La shows that the RNA chaperon domain plays critical roles in XCI. In mutant cells, *Xist* transcripts are misfolded and unstable. These results show that La is involved in XCI as an RNA chaperone for *Xist*.

## SIGNIFICANCE STATEMENT

*Xist* RNA functions as a scaffold to recruit and assemble a protein machinery to epigenetically silence genes along one X chromosome in each female mammalian cell. Here, we devised a FLAG-out system to profile the *Xist* interactome, and identified the lupus autoantigen La as an *Xist*-binding protein. The RNA chaperone activity of La is essential for X chromosome inactivation (XCI). When La is downregulated, the folding of *Xist* RNA is altered, leading to shorter half-life of *Xist* RNA and compromised *Xist* cloud formation, which in turn results in XCI defects, including chromatin compaction, chromosome-wide monoallelic gene expression pattern, and death of female ES cells during *in vitro* differentiation.

## INTRODUCTION

*Xist* RNA is a prototype long non-coding RNA (lncRNA) involved in X chromosome inactivation (XCI), a mammalian dosage compensation mechanism, in which one female X chromosome is transcriptionally silenced to balance the X-linked gene dosage between males and females (1). Upon the onset of XCI during early embryonic development, the coating of *Xist* RNA transcripts on the chromosome territory of the chosen inactive X chromosome (Xi) recruits epigenetic factors for heterochromatinization and establishes the chromosome-wide gene silencing (1). Intensive efforts have been spent in isolating *Xist*-binding proteins. Three attempts of comprehensive isolation of *Xist*-binding proteins were reported in 2015 (2-4). Chu et al. identified 81 candidate *Xist*-binding proteins (4). Using a more selective approach, McHugh et al identified a list of 10 candidate proteins (3). Meanwhile, through a more sensitive approach, Minajigi et al. generated a list of more than 700 proteins (2). 4 proteins were commonly identified by all three studies. These results generate an initial portrait of a fascinating and yet still poorly understood epigenetic machinery recruited/assembled by the *Xist* RNA. These results also illustrate the difficulty of balancing the assay's specificity and sensitivity in profiling a complex lncRNA-protein interactome.

Here, we devised a different system for profiling the *Xist* interactome. We have previously shown that the *Xist* RNA can be efficiently tagged in live cells by the programmable RNA-sequence binding domain of the Pumilio protein (PUF: Pumilio-homology domain; PBS: PUF-binding site) (5). A transgenic cell line previously generated in the lab is a male mouse ES cell line carrying an X-linked single-copy inducible *Xist* transgene with PBSb sites fused to its 5'-ends (Fig. 1a) (5). We further



engineered the cell line to have it stably express a PUFb-FLAG fusion protein (i-FLAG-*Xist*, Fig. 1a). Therefore, in this cell line, the *Xist* RNA is efficiently FLAG-tagged, which enables the usage of the highly specific and sensitive anti-FLAG antibody in the subsequent protein isolation work (Fig. 1b). Meanwhile, we engineered a negative control cell line, i-Empty, which stably expresses PUFb-FLAG but carries an empty inducible cassette (Fig. 1a). We name this method “FLAG-out”. In this study, using FLAG-out, we identified 138 candidate *Xist*-binding proteins, and further validated the lupus autoantigen La as an *Xist*-binding RNA chaperone functionally critical for XCI.

## RESULTS

### “FLAG-out” the *Xist*-binding proteins

After *Xist* induction, we fixed the cells by UV-crosslinking and performed FLAG affinity pull-down (Fig.1b). Mass-spec was used to analyze two protein pull-down samples, a dox-treated i-FLAG-*Xist* sample and a dox-treated i-Empty sample (Fig.1b). 69 proteins were identified only in i-FLAG-*Xist* but not in i-Empty. Furthermore, for the proteins identified in both samples, we ranked them according to their protein scores in each sample and calculated the ranking gains. hnRNPM, a known *Xist*-binding protein, showed a ranking gain of 11 in i-FLAG-*Xist*. Therefore, additional 69 proteins with ranking gains higher or equal to 11 were also selected as candidate proteins. In total, 138 candidate proteins were selected (Fig. 1c&d and Supplementary Table S1). Among the selected candidates, 9 proteins were also identified as *Xist*-binding proteins in previous studies (2-4) (Fig. 1c&d and Supplementary Table S1). Interestingly, the 138 candidate proteins can be clearly classified into 6 functional groups: [1] nuclear actin and related proteins (38 proteins); [2] chromatin and related proteins (13 proteins); [3] DNA and RNA binding proteins (20 proteins); [4] nuclear RNP, ribosomal and nucleolar proteins (30 proteins); [5] membrane proteins (8 proteins); [6] other proteins (29 proteins) (Fig. 1c&d and Supplementary information). The complete list of the candidate proteins is shown in Supplementary Table S1. Selected candidate proteins are shown in Fig. 1d.

### Validation of the functional significance of the lupus autoantigen La in the induced XCI

From the candidate proteins, we shortlisted three proteins for individual validation. Myb-binding protein 1A (Mybbp1a, Q7TPV4) and TAR DNA-binding protein 43 (Tardbp, Q921F2) were selected because they are known transcription repressors (6, 7). The Lupus autoantigen La (P32067, encoding-gene name: *Ssb*) was selected because systemic lupus erythematosus (SLE) is an autoimmune disease characterized by a strikingly high female to male ratios of 9:1(8). Moreover, its autoimmune antigen La is a ubiquitous and versatile RNA-binding protein and a known RNA chaperone (9). All the three selected candidates have also been identified as *Xist*-binding proteins in previous studies (2, 4). Moreover, the knockout of these three genes all lead to early embryonic death. *Tardbp* knockout causes embryonic lethality at the blastocyst implantation stage (10). *Mybbp1a* and *Ssb* knockout affect blastocyst formation (11, 12). Early embryonic lethality is a mutant phenotype consistent with a critical role of the mutated gene in XCI (1).

As the gene knockout of all three candidate genes causes early embryonic lethality, we chose to knock down their expression using shRNAs to validate the candidate genes' roles in the induced XCI. The selected cell line is a male ES cell line carrying an inducible X-linked *Xist* transgene. Inducible *Xist* expression in this cell line causes cell death due to the inactivation of the single X chromosome in male cells. Massive cell death usually occurs after 4-5 days of Doxycycline treatment, which can be used as a convenient assay to assess the functionalities of XCI (Fig. 2a). We established clonal ES cell lines stably expressing the shRNAs and confirmed the shRNA knockdown efficiencies (Fig. 2b). Knocking down *Ssb* (the gene encoding La) showed a negative effect on the cell growth rate (Fig. 2c&d), consistent with the role of La as a ubiquitous RNA-binding protein involved in house-

keeping functions such as tRNA biogenesis. Nonetheless, the cell survival rates show that knocking down *Ssb* significantly rescued the cells from the toxicity of induced XCI (Fig. 2c-e). These results confirm that La is involved in induced XCI. To rule out the off-target effect of shRNAs, we used a second shRNA construct and obtained similar results (Fig. 2c-e). In the forgoing experiments, cells were cultured as undifferentiated ES cells during the induction. We performed the Doxycycline-induced cell death assay in differentiating ES cells and obtained consistent results (Supplementary Figure S1). We further compared the X-linked genes' expression levels in control cells and in *Ssb* knockdown cells during the induced XCI. The expression level of 8 selected X-linked genes were measured by quantitative RT-PCR (Fig. 2f&g). Compared to the empty vector control, higher expression levels of X-linked genes were exclusively detected in *Ssb* knockdown cells showing the impaired XCI status in *Ssb* knockdown cells. These results confirm that La is involved in the induced XCI in the male transgenic cell line.

Meanwhile, our results do not confirm the functional roles of *Mybbp1a* and *Tardbp* in XCI (Fig. 2c&e). However, it is possible that the knockdown efficiencies of these two genes were not high enough to overcome the thresholds required to disturb XCI. Alternatively, there might be some redundant factors for *Mybbp1a* and *Tardbp* that compensate the loss of these two factors.

## **Validation of the functionality of La in endogenous XCI in female cells**

To validate the functionality of La in endogenous XCI, we performed shRNA knockdown of *Ssb* in female ES cells (Fig. 3a). We confirmed the knockdown efficiency on the selected clonal cell lines stably expressing shRNAs against *Ssb* (Supplementary Figure S2). XCI can be triggered in female mouse ES cells by *in vitro* differentiation. Massive cell death usually occurs during this process in female mouse ES cells with XCI defects (1). Consistent with this notion, we observed significant cell death in the *Ssb* knockdown cells during *in vitro* differentiation (Fig. 3b&c). Importantly, on the *Ssb* knockdown background, significantly more cell death was observed in female cells than male cells (Fig. 3b&c). Although *Ssb* knockdown showed negative effect on the cell growth rate of male ES cells (Fig. 2c&d), the morphology of male embryoid bodies (EBs) on day 4 of *in vitro* differentiation were comparable to the wild type EBs (Fig. 3b). The EBs could attach to the surface of the tissue culture flask and showed significant amount of expansion two days later (Fig. 3b). This is in clear contrast to the female EBs. With *Ssb* knockdown, the female EBs were small and unhealthy on day 4 of *in vitro* differentiation (Fig. 3b). The EBs barely attached to the surface of the tissue culture flask and showed no or very limited amount of expansion two days later (Fig. 3b). These results support a functional role of La in XCI.

As La is an RNA-binding protein involved in various house-keeping functions, the massive cell death, which occurred in *Ssb* knockdown female ES cells during *in vitro* differentiation, may not be directly and solely attributed to XCI defects. Therefore, we performed ATAC-seq (Assay for Transposase-Accessible Chromatin with high-throughput sequencing) to examine the chromatin compaction along X

chromosome. We also performed padlock SNP capture to directly assess the XCI status by allelotyping the X-linked gene expression chromosome-wide.

ATAC-seq was performed using male ES cell lines carrying an X-linked inducible *Xist* transgene so that the sequencing reads mapped onto X chromosome only reflect the chromatin status of one X chromosome, the inactive X. In ATAC-seq, the density of transposon insertion reveals the status of chromatin compaction. We analyzed the transposon insertion sites genome-wide and defined “Cut Count” as the number of transposon insertion sites identified within a 1-Mb region (Fig. 3d). The chromatin compaction status during the induced XCI was then quantitatively measured by the ratio of the Cut Counts between the uninduced undifferentiated cells and the differentiated cells treated with dox (Fig. 3d). Induced XCI clearly caused chromatin compaction in wild type cells, meanwhile the induced expression of a mutant *Xist* transgene with the critical A-repeat region deleted ( $i\Delta A$ -*Xist*) failed to generate chromatin compaction (Fig. 3d, Supplementary Figure S3). These results serve as controls to validate the experimental system. On the *Ssb* knockdown background, induced XCI also caused chromatin compaction, but to a lesser degree than that in wild type cells (Fig. 3d, Supplementary Figure S3). This observation was clearly made after 14 hours dox treatment. After 48 hours dox treatment, the chromatin compaction status was comparable between the wild type sample and the *Ssb* knockdown sample, although a slightly lesser degree of chromatin compaction was still visible in the knockdown sample (Fig. 3d, Supplementary Figure S3). These results directly connect La to the heterochromatinization of Xi, supporting a functional role of La in XCI. Meanwhile, the results also show that the *Ssb*

knockdown cells encountered difficulties during the early onset of XCI. We further discuss this issue in the later sections.

To directly assess the XCI status of X-linked genes, we comprehensively allelotyped X-linked genes. The shRNA knockdown was performed on a female ES cell line 3F1 (13), which carries Xs from two genetic backgrounds, the 129 mouse strain ( $X^{129}$ ) and the *Mus musculus castaneus* (CAST/Ei) mouse strain ( $X^{\text{Cast}}$ ) (Fig. 3a). The “preemptive choice” mutant phenotype of 3F1 cells causes non-random inactivation of the  $X^{129}$  allele (13) (Fig. 3a). Therefore, the XCI status of an X-linked gene can be evaluated by RNA allelotyping of  $X^{129}$  and  $X^{\text{Cast}}$ , which provide ample choice of single nucleotide polymorphisms (SNPs). Padlock SNP capture, a high-throughput and high-resolution RNA allelotyping method (14), was performed to profile the XCI status of X linked genes chromosome-wide. The padlock probe library was designed to target 2,969 SNPs covering 1,110 (~55%) of the X-linked genes (14). 457 X-linked genes were successfully allelotyped in the experiment. Padlock SNP capture detected bi-allelic expression of genes along the entire X chromosome in *Ssb* knockdown cells, demonstrating obvious XCI defects (Fig. 3e). This result provides the direct evidence confirming the critical functionality of La in XCI.

### **Knockdown of *Ssb* impairs *Xist* cloud formation**

To further study the functional roles of La in the endogenous XCI, we investigated the *Xist* cloud formation in *Ssb* knockdown cells. In undifferentiated female ES cells, *Xist* expression is detected as a pinpoint signal associated with its gene locus in *cis*. Upon differentiation, *Xist* expression is up-regulated along the chosen Xi and *Xist* RNA transcripts spread out to cover the chromosome territory *in*

*cis*. Thus, in differentiated female cells, *Xist* expression is detected as a cloud signal (the *Xist* cloud) enveloping the Xi chromosome territory. We performed *Xist* RNA FISH in differentiating ESCs (Fig. 4a, Supplementary Figure S4). After 6 days of *in vitro* differentiation, *Xist* clouds could be detected in more than 80% of the wild type cells. However, in *Ssb* knockdown cells, *Xist* clouds were detected in a significant lower percentage of cells (Fig. 4a, Supplementary Figure S4). Given that significant cell death occurs in *Ssb* knockdown cells during *in vitro* differentiation and RNA FISH cannot be applied to dead cells, the percentage of cells showing faulty *Xist* cloud formation should be even higher in *Ssb* knockdown cells. Taken together, these results show that La is involved in *Xist* cloud formation.

To avoid the shortcomings of RNA FISH not applicable to dead cells, and to observe the process of *Xist* cloud formation during the early onset of XCI, we performed live-cell imaging of *Xist* RNA. We previously established a live-cell imaging system of the *Xist* RNA in a transgenic male mouse ES cell line carrying an X-linked single-copy inducible *Xist* transgene with PBSb sites fused to its 5'-ends (Fig. 1a). The cell line also stably expresses a PUFb-GFP fusion protein. Therefore, *Xist* RNA can be efficiently GFP-tagged in live cells. We chose an inducible transgene to study the *Xist* RNA in live cells, because the system provides a synchronized onset of XCI in the cell population. In female cells, during the *in vitro* differentiation, the onset of the endogenous XCI occurs in an unsynchronized manner. For a given cell, the onset of XCI may occur at any time during a window of a few days. However, high-quality live-cell imaging can only be performed within a 2-hour time window due to technical issues, such as photo-bleaching and phototoxicity. In our experimental system, dox treatment was started after the cells



were *in vitro* differentiated for 16 hours. Live-cell imaging was performed 1 hour after dox treatment and lasted for 2 hours with a 2-minute time interval. Because the selected time window belongs to the early onset stage of XCI, the issue of cell death caused by XCI defects is circumvented. In wild type differentiating cells, the behavior of *Xist* cloud formation is synchronized and consistent (5). The *Xist* RNA signals first appear as small pinpoint signals that then gradually grew into  $\sim 2\ \mu\text{m}$  large *Xist* RNA clouds within 60-90 min (Fig. 4b, Movies S1-3). In *Ssb* knockdown cells, the *Xist* cloud formation clearly encountered difficulties (Fig. 4c-e, Movies S4-7). In some cells, an *Xist* RNA signal first appeared as a small pinpoint signal, but the pinpoint signal failed to stabilize. Instead of growing into a large cloud signal, the pinpoint signal was on and off during the first 60-90 min after the signal first appeared (Fig. 4c, Movies S4). In some other cells, a pinpoint *Xist* RNA signal grew into a faint cloud signal, and the cloud signal quickly diffused and vanished (Fig. 4d, Movies S5). We analyzed 64 *Xist* signals in wild type cells and 52 *Xist* signals in *Ssb* knockdown cells. The total fluorescent intensity of each *Xist* signal was measured every 2 minutes during the first 40 minutes after the signal first appeared (Fig. 4e). The results clearly revealed the faults of *Xist* cloud formation on the *Ssb* knockdown background. In summary, the observed behaviors of *Xist* cloud formation in *Ssb* knockdown cells are heterogenous but consistently show the difficulties encountered in forming the *Xist* cloud. In mutant cells, the *Xist* RNA transcripts failed to spread out and coat the X chromosome territory. It is likely that the RNA transcripts are quickly diffused and/or degraded. As *Xist* cloud formation is the initial step which triggers XCI, the defective *Xist* cloud formation should be the primary reason behind

other XCI defects observed in *Ssb* knockdown cells. These results confirm that the defining XCI defect in *Ssb* knockdown cells is faulty *Xist* cloud formation.

### **Knockdown of *Ssb* compromises the enrichment of Polycomb marks on Xi**

Even though *Xist* cloud formation is less efficient in the mutant cells, the knockdown cell population behave heterogeneously and *Xist* clouds are formed in a substantial fraction of surviving cells. We further investigated whether La regulates other events during the later stages of XCI. It is known that, in order to inactivate one large chromosome, *Xist* cloud recruits other silencing factors to heterochromatinize Xi with multiple layers of epigenetic modifications (1). Two histone modifications enriched along Xi are the Polycomb marks, H3K27me3 and H2AK119ub (15). We performed immuno-RNA FISH to study the role of La in Polycomb marks enrichment along Xi. After 6 days *in vitro* differentiation, most of the *Xist* clouds signals in RNA FISH overlapped with enrichments of Polycomb marks detected by the immunostains (Fig. 5a&b). However, the enrichment of Polycomb marks along Xi is significantly disrupted in *Ssb* knockdown cells. These results suggest that La is also involved in establishing the enrichment of Polycomb marks along Xi.

### **The RNA chaperone domain of La is critical in XCI**

La is an RNA-binding protein with 5 defined functional domains including 3 RNA-binding domains (La motif, LAM; RNA recognition motif 1, RRM1; RNA recognition motif 2, RRM2), an RNA chaperone domain (RCD) and a nuclear localization signal (NLS) (Fig. 6a). We generated plasmid constructs carrying in-frame deletions of the selected domains of La (Fig. 6a) and stably transfected the

*Ssb* knockdown cells with these “rescue” plasmid constructs (Fig. 6b). GFP fusion was included in the plasmid design for checking transfection efficiencies and the transgene expression levels in the selected clonal cell lines. We first rescued female ES cells with a full-length *Ssb* construct (Supplementary Figure S5). Indeed, the full-length *Ssb* construct showed significant rescue effects on cell survival, *Xist* cloud formation and Polycomb marks enrichment (Supplementary Figure S5). Meanwhile, all  $\Delta$  constructs showed significant rescue effects of various degrees on the cell survival during *in vitro* differentiation, except for  $\Delta$ RCD and  $\Delta$ NLS, indicating the critical roles of these two functional domains (Fig. 6c). For *Xist* cloud formation,  $\Delta$ NLS and  $\Delta$ RCD showed no rescue effect, while other  $\Delta$  constructs showed significant rescue effects of various degrees (Fig. 6d). These results show that all three RNA-binding domains are required for the functionality of La in XCI and highlight the critical functions of the RCD and NLS. As XCI is a nuclear event, it is obvious why the NLS of La is critical for its functionality in XCI. On the other hand, the critical role of RCD (RNA chaperone domain) of La in XCI is intriguing.

### ***Xist* RNA is misfolded and less stable on *Ssb* knockdown background**

We believe La is an *Xist*-binding RNA chaperone important for folding of the RNA. To access the folding of *Xist* RNA, we performed SHAPE-MaP (selective 2'-hydroxyl acylation analyzed by primer extension and mutational profiling) (16). The RNA structure was probed by 1-methyl-7-nitroisatoic (1M7), which reacts with 2'-hydroxyl group and forms adducts along the RNA with a preference of unstructured regions. Chemical adducts along the treated RNA affect the fidelity of reverse

transcription reaction and are detected as “mutation rates” by sequencing, which can be used to access the RNA structure. Using male ES cell lines carrying the inducible *Xist* transgene, we performed in-cell SHAPE experiments in wild type cells (duplicate samples), *Ssb* knockdown cells (duplicate samples) and DMSO control (duplicate samples) (Fig. 6e). Along the ~18kb *Xist* RNA, we only analyzed the 3,800 nucleotides which were covered by more than 10,000 reads in each sample (“profiled nucleotides”, Fig. 6e). We selected 0.1% mutation rate as the threshold. A mutation rate greater than 0.1% is considered “positive”. 0.1% is close to the error rate of the current illumina sequencing technology and occurs to be a natural boundary separating the two control samples and the four 1M7-treated samples in our experiments. Among the profiled nucleotides, all the 291 incidents of positive mutation rate were detected in 1M7-treated samples (Fig. 6f). The distribution patterns of the nucleotides with positive mutation rates are consistent between the two wild type samples. These data validate the SHAPE experimental system. Interestingly, the distribution patterns of the wild type samples are clearly distinguishable from mutation samples; and the two mutant sample also different from each other (Fig. 6g-i). This observation can be best illustrated by the 467 profiled nucleotides along the 5000<sup>th</sup>-6000<sup>th</sup> nucleotide region of *Xist* (Fig. 6g). Principle component analysis of the global SHAPE reactivity profiles and the structure predictions based on SHAPE reactivities are also in consistent with this notion (Fig. 6h&i). These data show that *Xist* RNA is misfolded in mutant cells. Very likely, the misfolded RNA forms a random pool of transcripts which lacks a consensus structure and shows poor consistency from sample to sample.

We further investigated whether the misfolded *Xist* transcripts are subjected to degradation. To access the stability of *Xist* RNA on *Ssb* knockdown background, we studied the disappearance of the *Xist* cloud signals after doxycycline removal (the “sunset” process). Cells were cultured in differentiating conditions and treated with doxycycline overnight before doxycycline removal. The rate of the sunset process reflects the stability of the *Xist* RNA. We observed a significantly faster sunset rate on *Ssb* knockdown background (Fig. 7a&b), especially within the first two hours after dox removal. To further access the stability of *Xist* RNA, we performed quantitative RT-PCR to quantify the *Xist* RNA during sunset. The cell lines used were male ES cell lines carrying the inducible *Xist* transgene (Fig. 7c&d). *Xist* transcription was blocked by doxycycline removal and actinomycin D treatment. The data was best fitted using a first-order exponential decay model (Fig. 7c). Half-life of *Xist* RNA was then calculated (Fig. 7d). Consistent with our live-cell imaging data, quantitative RT-PCR results show that the half-life of *Xist* is significantly shorter on *Ssb* knockdown background. Interestingly, it seems the decay reaction kinetics of *Xist* in *Ssb* knockdown cells can be separated into two phases (Fig. 7c). The first hour is the first phase of the reaction, which is a short phase and only contains two data points. The rest of the data points form the second phase of the decay reaction and can be better fitted in one reaction curve separately from the 0 time point. The half-life of *Xist* RNA estimated from the data of the second phase is shorter and with more statistical significance (Fig. 7d). We provide our interpretation on this in the discussion section.

Taken together, SHAPE results show that the *Xist* RNA transcripts are misfolded on *Ssb* knockdown background, and the shorter half-life of *Xist* RNA suggests that the misfolded *Xist* RNA transcripts are subjected to faster degradation.

## DISCUSSION

Here we show that FLAG-out is a useful method for profiling the interactome of lncRNAs. The advantage of FLAG-out is that once the target RNA is FLAG-tagged, the high specificity and high sensitivity of anti-FLAG antibody can be applied for the subsequent protein isolation. It should be noticed that selection of the PBS insertion site along the target RNA affects the outcome of FLAG-out. In this study, the PBSb sites are fused at the 5' end of *Xist*, a position close to the most critical functional domain of *Xist*. In our previous study, we have shown that the 5' PBSb fusion does not affect the *Xist* functionality (5).

La is a known RNA chaperone able to utilize ATP to unwind RNA-RNA and RNA-DNA duplex (9). Based on the results of this study, we propose that La is an *Xist*-binding RNA chaperone involved in *Xist* RNA folding and spreading (Fig. 7e). In the mutant cells, the misfolded *Xist* RNA transcripts are unstable and unable to spread and form the *Xist* clouds. These defects eventually lead to failure of *Xist* cloud formation and collapse of XCI.

La is an autoimmune antigen found in the serum of patients with autoimmune diseases. More than 80% of the patients with autoimmune disorders are female (8). It is a possibility that XCI is related to the striking sex ratio distortion of autoimmune disorders. Multiple hypotheses have been developed. As numerous X-linked genes are related to immune functions, dysregulated expression of these genes may cause malfunction of the immune system. Therefore, skewed XCI pattern (loss of mosaicism), imbalanced X-linked gene dosage (X chromosome reactivation in early T cell lineage and haploinsufficiency in X chromosome monosomy) have all been hypothesized as possible causes of the sex ratio distortion in autoimmune disorders

(8, 17). In *Ssb* knockdown cells, dysregulated gene expression occurs on many X-linked genes including the genes functionally related to immune functions (Fig. 2f&g). These results suggest that *Ssb* may be a potential genetic factor of autoimmune diseases. However, identifying the lupus autoantigen La, as a protein involved in XCI does not help to further explain the sex ratio distortion. Rather, we believe it is a consequence of autoimmune disorders. Nuclear RNPs are immunogenic (18). The inactive X chromosome coated with *Xist* RNA and its associated proteins is a large piece of nuclear RNP in female cells, which can trigger autoimmune responses when exposed to the immune system under abnormal situations.

Understanding the structure of lncRNAs is critical for understanding lncRNAs' functionality. Initial efforts to elucidate the *Xist* RNA structure have been reported, but significant inconsistency exists among the results of the initial studies (19-22). Nonetheless, several interesting and important issues are revealed. First, the in-cell structure of the RNA is significantly different from the *ex-vivo* structure of the RNA purified with mild conditions. Second, subregions of *Xist* may form dynamic structures in living cells. SHAPE analysis suggests that the dynamic structures function as loading pads for protein recruitment (20). In PARIS, a method in which the RNA structures are fixed in cells and the interacting regions of RNAs (duplex sequences) are directly sequenced, significant amount of conflicting duplex sequences is detected, which shows the *Xist* structure is highly dynamic in living cells (21). In our study, identifying La as an *Xist*-binding RNA chaperon provides an important piece to the puzzle. Interestingly, La possesses three RRM, which may function in a synergistic manner in regulating *Xist* structure in living cells.



As a protein involved in tRNA maturation, a significant fraction of La is located in the nucleolus (23, 24). The nucleolus may function as a general factory for assembling nuclear RNP particles, not just for rRNAs. *Xist* and its associated proteins forms a unique RNP complex in female cells. The fact that La is an *Xist*-binding RNA chaperone may be one reason behind the frequent association of the Xi with the nucleolus (25, 26).

It is an interesting observation that the decay reaction of *Xist* in *Ssb* knockdown cells seems to consist of two phases. The first hour of the reaction is a transient phase in which the decay reaction shows a slow kinetics. The rest of the data points form the second phase of the reaction which shows a significantly faster kinetics. To interpret the data, we assume that the decay reaction of *Xist* is catalyzed by both endonucleases and exonucleases. Endonuclease creates nicks along the RNA, which further serve as the starting points for exonucleases. Without the RNA chaperone activity of La, misfolded *Xist* RNA may be depleted for protein-binding and the RNA may be randomly folded in order to “protect” the hydrophobic bases from the hydrophilic environment. Therefore, compared to the protein-binding biologically active form, the misfolded structures may be more compact, which prevents the initial endonuclease reaction. Once the endonuclease reaction generates enough nicks to trigger the action of exonucleases, the degradation reaction quickly speeds up. However, we do not have enough data to study the transient first phase in detail, therefore, this interpretation may be speculative at this point. The details of the decay reaction and, more importantly, the structural details of *Xist* await future studies.

## **MATERIALS AND METHODS**

### **Cell lines and culture**

Mouse ES cells were cultured in medium containing 1000 unit/ml LIF. Feeder cells used were Drug Resistant 4 Mouse Embryonic Fibroblasts (DR4-MEF) (Applied StemCell; ASF-1002). Feeder-free ES cells were cultured on culture dishes pre-treated with 0.2 % gelatin (Sigma-Aldrich; G2500).

For *in vitro* differentiation, cells were cultured in differentiation medium containing 50 µg/ml L-ascorbic acid (Sigma). For the first 4 days of *in vitro* differentiation, embryoid bodies (EBs) were cultured in suspension. On day 4, EBs were transferred to a gelatinized T75 tissue culture flask. On day 5, EBs failed to attach to the tissue culture flask were washed away. On day 6, surviving cells were harvested for subsequent experiments.

Detailed information is provided in Supplementary Materials and Methods.

## **ACKNOWLEDGEMENTS**

L-F.Z. was supported by Singapore Ministry of Education Academic Research Fund (MOE2015-T2-1-093) and by the Singapore National Research Foundation under its Cooperative Basic Research Grant administered by the Singapore Ministry of Health's National Medical Research Council (NMRC/CBRG/0092/2015). L.C. was supported by the National Key R&D Program of China (Grant No. 2018YFC1313003 and 2018YFA0107002), the National Natural Science Foundation of China (Grant No. 31622038, 31671497 and 31871485), the Natural Science Foundation of Tianjin (Grant No. 18JCJQJC48400), the 111 Project Grant (B08011), and the Fundamental Research Funds for the Central Universities.

## **DECLARATION OF INTERESTS**

The authors declare no competing interests.

## REFERENCES

1. B. Payer & J.T. Lee. X chromosome dosage compensation: how mammals keep the balance. *Annu Rev Genet.* 42, 733-772 (2008).
2. A. Minajigi, *et al.* Chromosomes. A comprehensive Xist interactome reveals cohesin repulsion and an RNA-directed chromosome conformation. *Science.* 349, 2015).
3. C.A. McHugh, *et al.* The Xist lncRNA interacts directly with SHARP to silence transcription through HDAC3. *Nature.* 521, 232-236 (2015).
4. C. Chu, *et al.* Systematic discovery of Xist RNA binding proteins. *Cell.* 161, 404-416 (2015).
5. N. Ha, *et al.* Live-Cell Imaging and Functional Dissection of Xist RNA Reveal Mechanisms of X Chromosome Inactivation and Reactivation. *iScience.* 8, 1-14 (2018).
6. Y. Hara, *et al.* Molecular characterization of Mybbp1a as a co-repressor on the Period2 promoter. *Nucleic Acids Res.* 37, 1115-1126 (2009).
7. S.H. Ou, F. Wu, D. Harrich, L.F. Garcia-Martinez, & R.B. Gaynor. Cloning and characterization of a novel cellular protein, TDP-43, that binds to human immunodeficiency virus type 1 TAR DNA sequence motifs. *J Virol.* 69, 3584-3596 (1995).
8. C. Libert, L. Dejager, & I. Pinheiro. The X chromosome in immune functions: when a chromosome makes the difference. *Nat Rev Immunol.* 10, 594-604 (2010).

9. M. Bachmann, K. Pfeifer, H.C. Schroder, & W.E. Muller. Characterization of the autoantigen La as a nucleic acid-dependent ATPase/dATPase with melting properties. *Cell*. 60, 85-93 (1990).
10. B.C. Kraemer, *et al.* Loss of murine TDP-43 disrupts motor function and plays an essential role in embryogenesis. *Acta Neuropathol.* 119, 409-419 (2010).
11. S. Mori, *et al.* Myb-binding protein 1A (MYBBP1A) is essential for early embryonic development, controls cell cycle and mitosis, and acts as a tumor suppressor. *PloS one*. 7, e39723 (2012).
12. J.M. Park, *et al.* The multifunctional RNA-binding protein La is required for mouse development and for the establishment of embryonic stem cells. *Mol Cell Biol.* 26, 1445-1451 (2006).
13. J.T. Lee & N. Lu. Targeted mutagenesis of Tsix leads to nonrandom X inactivation. *Cell*. 99, 47 (1999).
14. R. Hong, *et al.* High-resolution RNA allelotyping along the inactive X chromosome: evidence of RNA polymerase III in regulating chromatin configuration. *Sci Rep.* 7, 45460 (2017).
15. N. Brockdorff. Polycomb complexes in X chromosome inactivation. *Philos Trans R Soc Lond B Biol Sci.* 372, 2017).
16. M.J. Smola, G.M. Rice, S. Busan, N.A. Siegfried, & K.M. Weeks. Selective 2'-hydroxyl acylation analyzed by primer extension and mutational profiling (SHAPE-MaP) for direct, versatile and accurate RNA structure analysis. *Nat Protoc.* 10, 1643-1669 (2015).

17. J. Wang, *et al.* Unusual maintenance of X chromosome inactivation predisposes female lymphocytes for increased expression from the inactive X. *Proc Natl Acad Sci U S A.* 113, E2029-2038 (2016).
18. W.J. van Venrooij & G.J. Pruijn. Ribonucleoprotein complexes as autoantigens. *Curr Opin Immunol.* 7, 819-824 (1995).
19. F. Liu, S. Somarowthu, & A.M. Pyle. Visualizing the secondary and tertiary architectural domains of lncRNA RepA. *Nat Chem Biol.* 13, 282-289 (2017).
20. M.J. Smola, *et al.* SHAPE reveals transcript-wide interactions, complex structural domains, and protein interactions across the Xist lncRNA in living cells. *Proc Natl Acad Sci U S A.* 113, 10322-10327 (2016).
21. Z. Lu, *et al.* RNA Duplex Map in Living Cells Reveals Higher-Order Transcriptome Structure. *Cell.* 165, 1267-1279 (2016).
22. R. Fang, W.N. Moss, M. Rutenberg-Schoenberg, & M.D. Simon. Probing Xist RNA Structure in Cells Using Targeted Structure-Seq. *PLoS Genet.* 11, e1005668 (2015).
23. S. Horke, K. Reumann, M. Schweizer, H. Will, & T. Heise. Nuclear trafficking of La protein depends on a newly identified nucleolar localization signal and the ability to bind RNA. *J Biol Chem.* 279, 26563-26570 (2004).
24. J.S. Deng, Y. Takasaki, & E.M. Tan. Nonhistone nuclear antigens reactive with autoantibodies. Immunofluorescence studies on distribution in synchronized cells. *J Cell Biol.* 91, 654-660 (1981).
25. L.F. Zhang, K.D. Huynh, & J.T. Lee. Perinucleolar targeting of the inactive X during S phase: evidence for a role in the maintenance of silencing. *Cell.* 129, 693-706 (2007).

26. M.L. Barr & E.G. Bertram. A Morphological Distinction between Neurones of the Male and Female, and the Behaviour of the Nucleolar Satellite during Accelerated Nucleoprotein Synthesis. *Nature*. 163 676 (1949).

## FIGURE LEGENDS

**Figure 1. Schematic diagram of “FLAG-out” and its identified *Xist*-binding proteins.** (a) Diagram of the transgenic mouse ES cell lines i-FLAG-*Xist* and i-Empty. (b) Diagram of the experimental design of “FLAG-out” and a protein gel image of the FLAG pull-down samples. (c, d) Candidate *Xist*-binding proteins identified by FLAG-out.

**Figure 2. Individual validation of three candidate *Xist*-binding proteins.** (a) The experimental design of the cell survival assay. (b) Quantitative RT-PCR to assess the effect of shRNA knockdown. Clonal ES cell lines stably transfected with the shRNA constructs were established. Cells stably transfected with the empty shRNA vector (Empty) serve as the control. Data are shown in relative fold expression. Normalization was performed using *Actb* and *Gapdh*. Error bars indicate SEM (n=3). (c) Representative macrographs of alkaline phosphatase staining on undifferentiated ES cell colonies, using EGFP-iXist cells (5). Clonal ES cell lines stably transfected with the shRNA constructs against *Mybbp1a*, *Tardbp*, *Ssb* and the empty shRNA vector were cultured as undifferentiated ES cells. Doxycycline treatment was carried out for 5 days. (d) Cell count was quantified as the sum of area of alkaline phosphatase staining. Data are shown as mean  $\pm$  SEM. n = 15 for Empty; n = 6 for *shSsb1*; n = 9 for *shSsb2*, from at least two independent experiments. (e) Cell survival rate was calculated by alkaline phosphatase-stained colony counts. Data are shown as mean  $\pm$  SEM. The statistical analysis used is the Student’s *t*-test. \*\*p < 0.006; \*\*\*p < 0.001; n = the number of experimental replications. (f & g) Quantitative RT-PCR to assess the effect of *Ssb* knockdown on X-linked gene expression during



the induced XCI. 8 X-linked genes were selected. *tdTomato* and *G418* (neomycin selection cassette) are two X-linked transgenes and the rest are endogenous X-linked genes. *Ssb* (chromosome 2) was included to show the effect of shRNA knockdown. Cells were cultured as differentiating ES cells and Doxycycline treatment was carried out for 14 hours or 48 hours. Data are shown in relative fold expression. Normalization was performed using *Actb*. Error bars indicate SEM (n=6, from two independent experiments). The statistical analysis used is the Student's *t*-test. n.s > 0.05; \*p < 0.05; \*\*p < 0.006; \*\*\*p < 0.001.

**Figure 3. Functional validation of La in female ES cells during the endogenous XCI. (a)** The genotype and the preemptive XCI choice phenotype of 3F1 cells. **(b)** Representative brightfield microscope images showing the differentiating 3F1 ES cells at day 4 (D4) and day 6 (D6) of *in vitro* differentiation. Scale bars, 250  $\mu$ m. **(c)** Cell survival rates on *in vitro* differentiation day 6. Data are shown as mean  $\pm$  SEM. The statistical analysis used is the Student's *t*-test. \*\*\*p < 0.0001; n = 9 from three independent experiments. **(d)** ATAC-seq results. The mouse X chromosome is divided into ~160 1-mb regions. The Cut Count of each region was analyzed, and the chromatin compaction status was quantitatively measured for each region. The results are shown in heatmaps. i- $\Delta$ A-*Xist* is an inducible mutant *Xist* transgene, in which the critical A-repeat region is deleted. **(e)** Heatmaps of chromosome-wide RNA allelotyping results. RNA samples were isolated from differentiating ES cells on day 6 of *in vitro* differentiation.

**Figure 4. La plays critical roles in *Xist* cloud formation. (a) *Xist* RNA FISH**

results of day 6 *in vitro* differentiation female ES cells. Quantification of *Xist* RNA signals from four independent experiments is shown. Data are shown as mean  $\pm$  SEM. The statistical analysis used is  $\chi^2$  test. \*\*\*  $p < 0.0001$ ;  $n = 505$  for Empty;  $n = 540$  for shSsb 1;  $n = 499$  for shSsb 2. **(b-d)** Live-cell imaging of *Xist*. The *Xist* RNA cloud formation processes in one representative wild type cell and two *Ssb* knockdown cells are shown. Dox treatment was started after cells were *in vitro* differentiated for 16 hours. Live-cell imaging was started one hour after dox treatment. All the live-cell imaging was carried out in a 2-hour time span with a time interval of 2 min. For direct comparison between the two *Xist* signals, images are shown in a 66 min time span with a 6 min time interval. The time point when a signal was first detected is defined as time zero for the signal. Maximum intensity z-projections are shown. **(e)** The total fluorescent intensity of an *Xist* RNA signal in live cells was measured every 2 minutes for the first 40 minutes after the signal first appeared. The measurement was done on 64 *Xist* signals from wild type cells and 52 *Xist* signals from *Ssb* knockdown cells. *Xist* signals were randomly selected from two independent experiments. The data are presented in box plots. Student's *t*-test was performed to compare the pair of data sets at each time point.  $p > 0.05$  for the time points of 0 – 8 min;  $p < 0.05$  for the time points of 14 & 16 min;  $p < 0.009$  for the rest of the time points.

**Figure 5. *Ssb* is involved in Polycomb mark enrichment along Xi. (a, b)**

Immuno-RNA FISH detecting H2AK119ub, H3K27me3 and *Xist*. Female ES cells were *in vitro* differentiated for 6 days. Immunostains were performed before the RNA

FISH. DNA was counter stained with DAPI (blue). Scale bars, 8  $\mu$ m. The total number of *Xist* clouds with clear, ambiguous or undetectable overlapping with the histone mark enrichment were tallied and tabulated below.

**Figure 6. Dissecting the functional domains of La in XCI.** **(a)** Diagram of the functional domains of La and the serial of plasmid constructs carrying in-frame deletions of selected functional domains ( $\Delta$  constructs). **(b)** Experimental design of the rescue experiment. **(c)** The rescue effects of  $\Delta$  constructs on cell survival of *Ssb* knockdown cells during *in vitro* differentiation. Cell counts of day 6 *in vitro* differentiation are shown. Data are shown as mean  $\pm$  SEM. The statistical analysis used is the Student's *t*-test. The data pairs with  $p > 0.05$  (n.s.) are labeled.  $p < 0.0001$  for all the rest of the pairwise comparison between Empty and any one of the serial  $\Delta$  constructs.  $n = 18$  from 6 independent experiments for Empty;  $n = 6$  from 2 independent experiments for the rest of the constructs. **(d)** Quantification of *Xist* RNA FISH signals. Data are shown as mean  $\pm$  SEM ( $n > 230$  for all the constructs). Only the data pair with  $p > 0.05$  (n.s.) is labeled.  $p < 0.0001$  for all the rest of the pairwise comparison between Empty and any one of the serial  $\Delta$  constructs. The statistical analysis used is  $\chi^2$  test. **(e)** Sample identities of SHAPE experiments and parameters used in data analysis. **(f)** Mutation rates of the 3,800 profiled nucleotides of each sample. **(g)** The distribution pattern of the profiled nucleotides with positive mutation rates along the region of 5000<sup>th</sup> to 6000<sup>th</sup> nucleotide of mouse *Xist* cDNA. Only profiled nucleotides with positive mutation rates are shown. The nucleotides are arranged in a sequential order based on nucleotide positions along *Xist*. Each

nucleotide is represented by a red bar. **(h)** A PCA plot of the SHAPE reactivity profiles. **(h)** Pairing probabilities of D-repeat based on SHAPE reactivity profiles.

**Figure 7. Stability of *Xist* on *Ssb* knockdown background by live-cell imaging after doxycycline removal, and a proposed model of how La is involved in XCI as an *Xist*-binding RNA chaperone. (a, b)** The disappearance of *Xist* cloud signals in live cells after doxycycline removal. Cells were treated with dox overnight in differentiating conditions. *Xist* cloud signals were assessed hourly after doxycycline removal. Representative images are shown. Scale bars, 8  $\mu$ m. At each time point, images were collected from ~12 randomly selected fields. The percentage of cells with *Xist* clouds in each field was quantified and the results are shown in box plots. The total number of cells analyzed at each time point is shown on the top. The statistical analysis used is the Student's *t*-test. \**p* = 0.05; \*\*\**p* < 0.01. **(c, d)** Measurement of *Xist* stability by real-time PCR. Normalization was performed using *Actb*. Data was fitted using an exponential decay model with corresponding R-squared shown. The half-life of *Xist* was then calculated. Error bars indicate SD (n=3). **(e)** The proposed model.

Figure 1

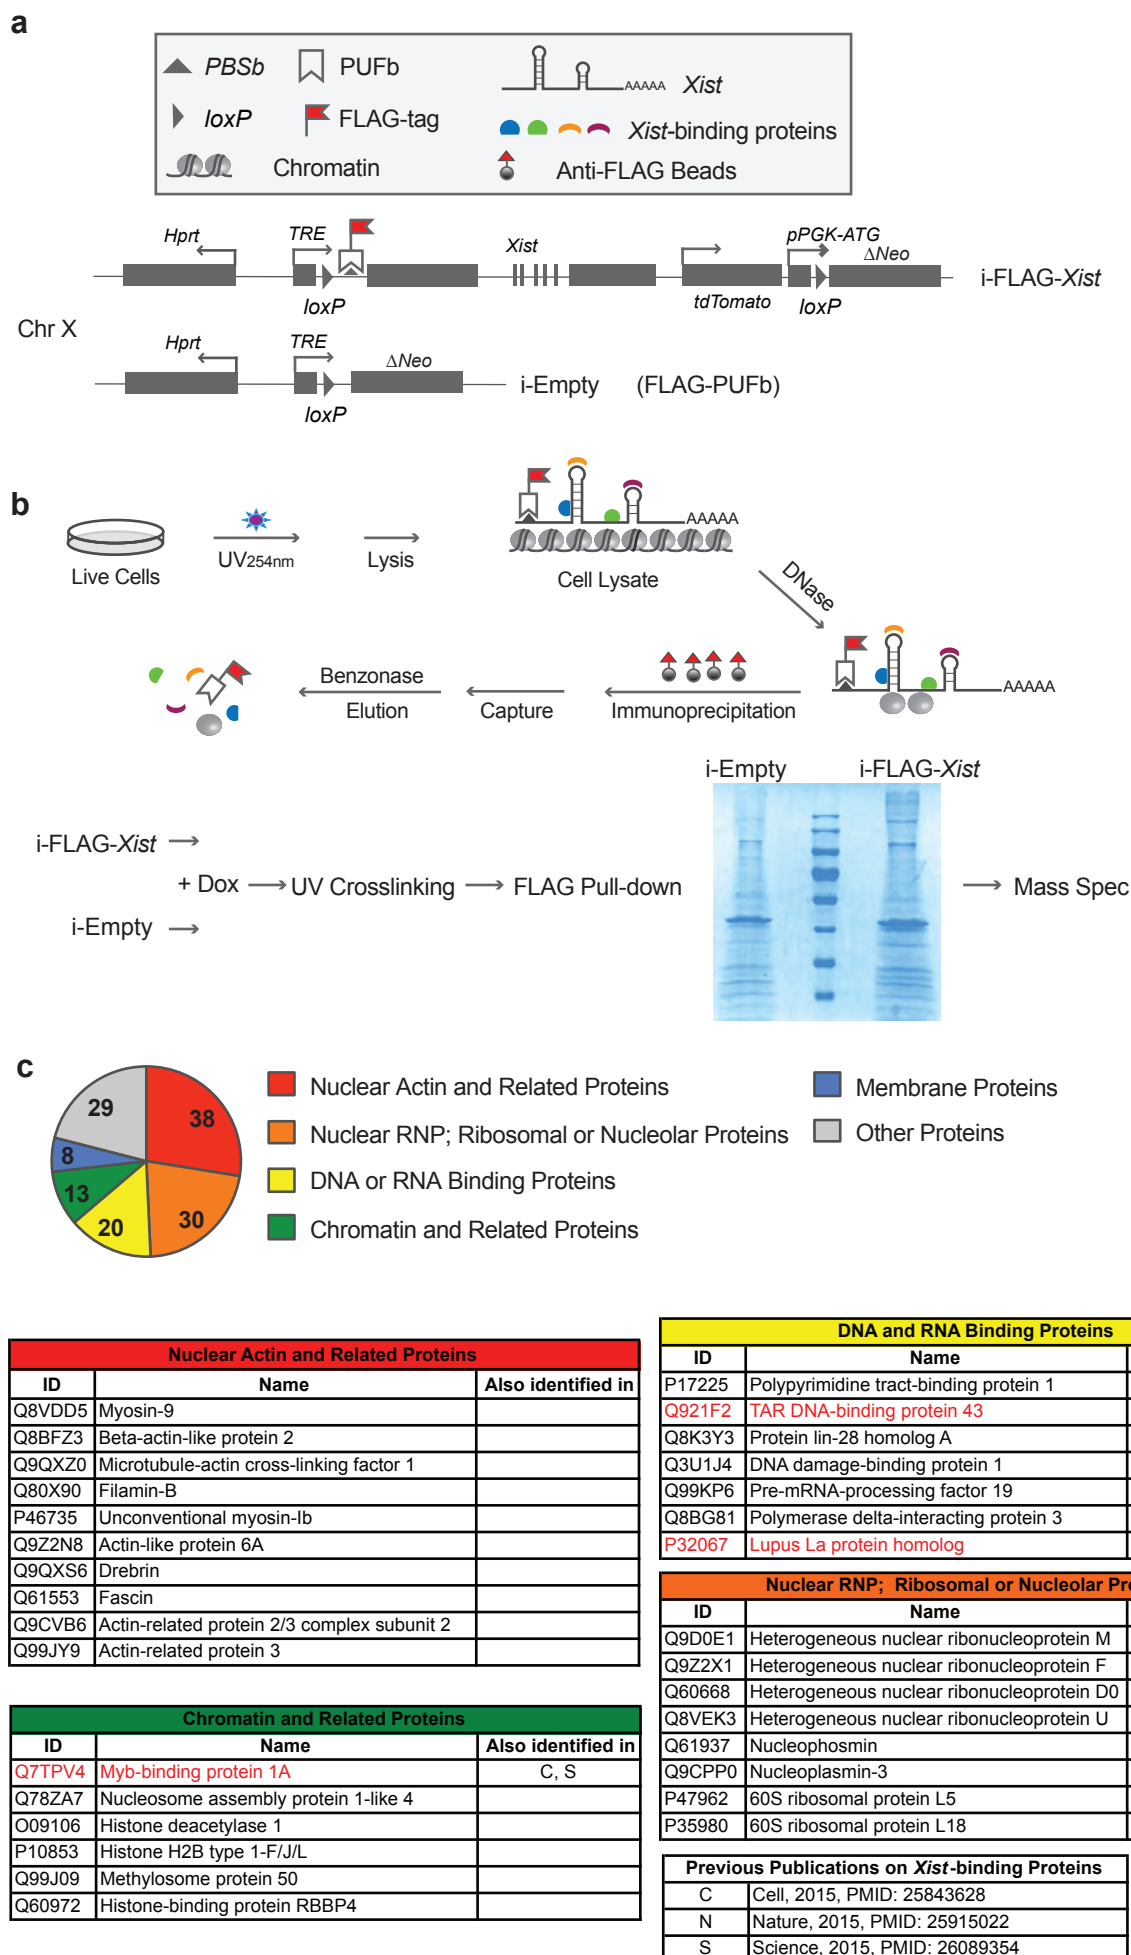

Figure 2

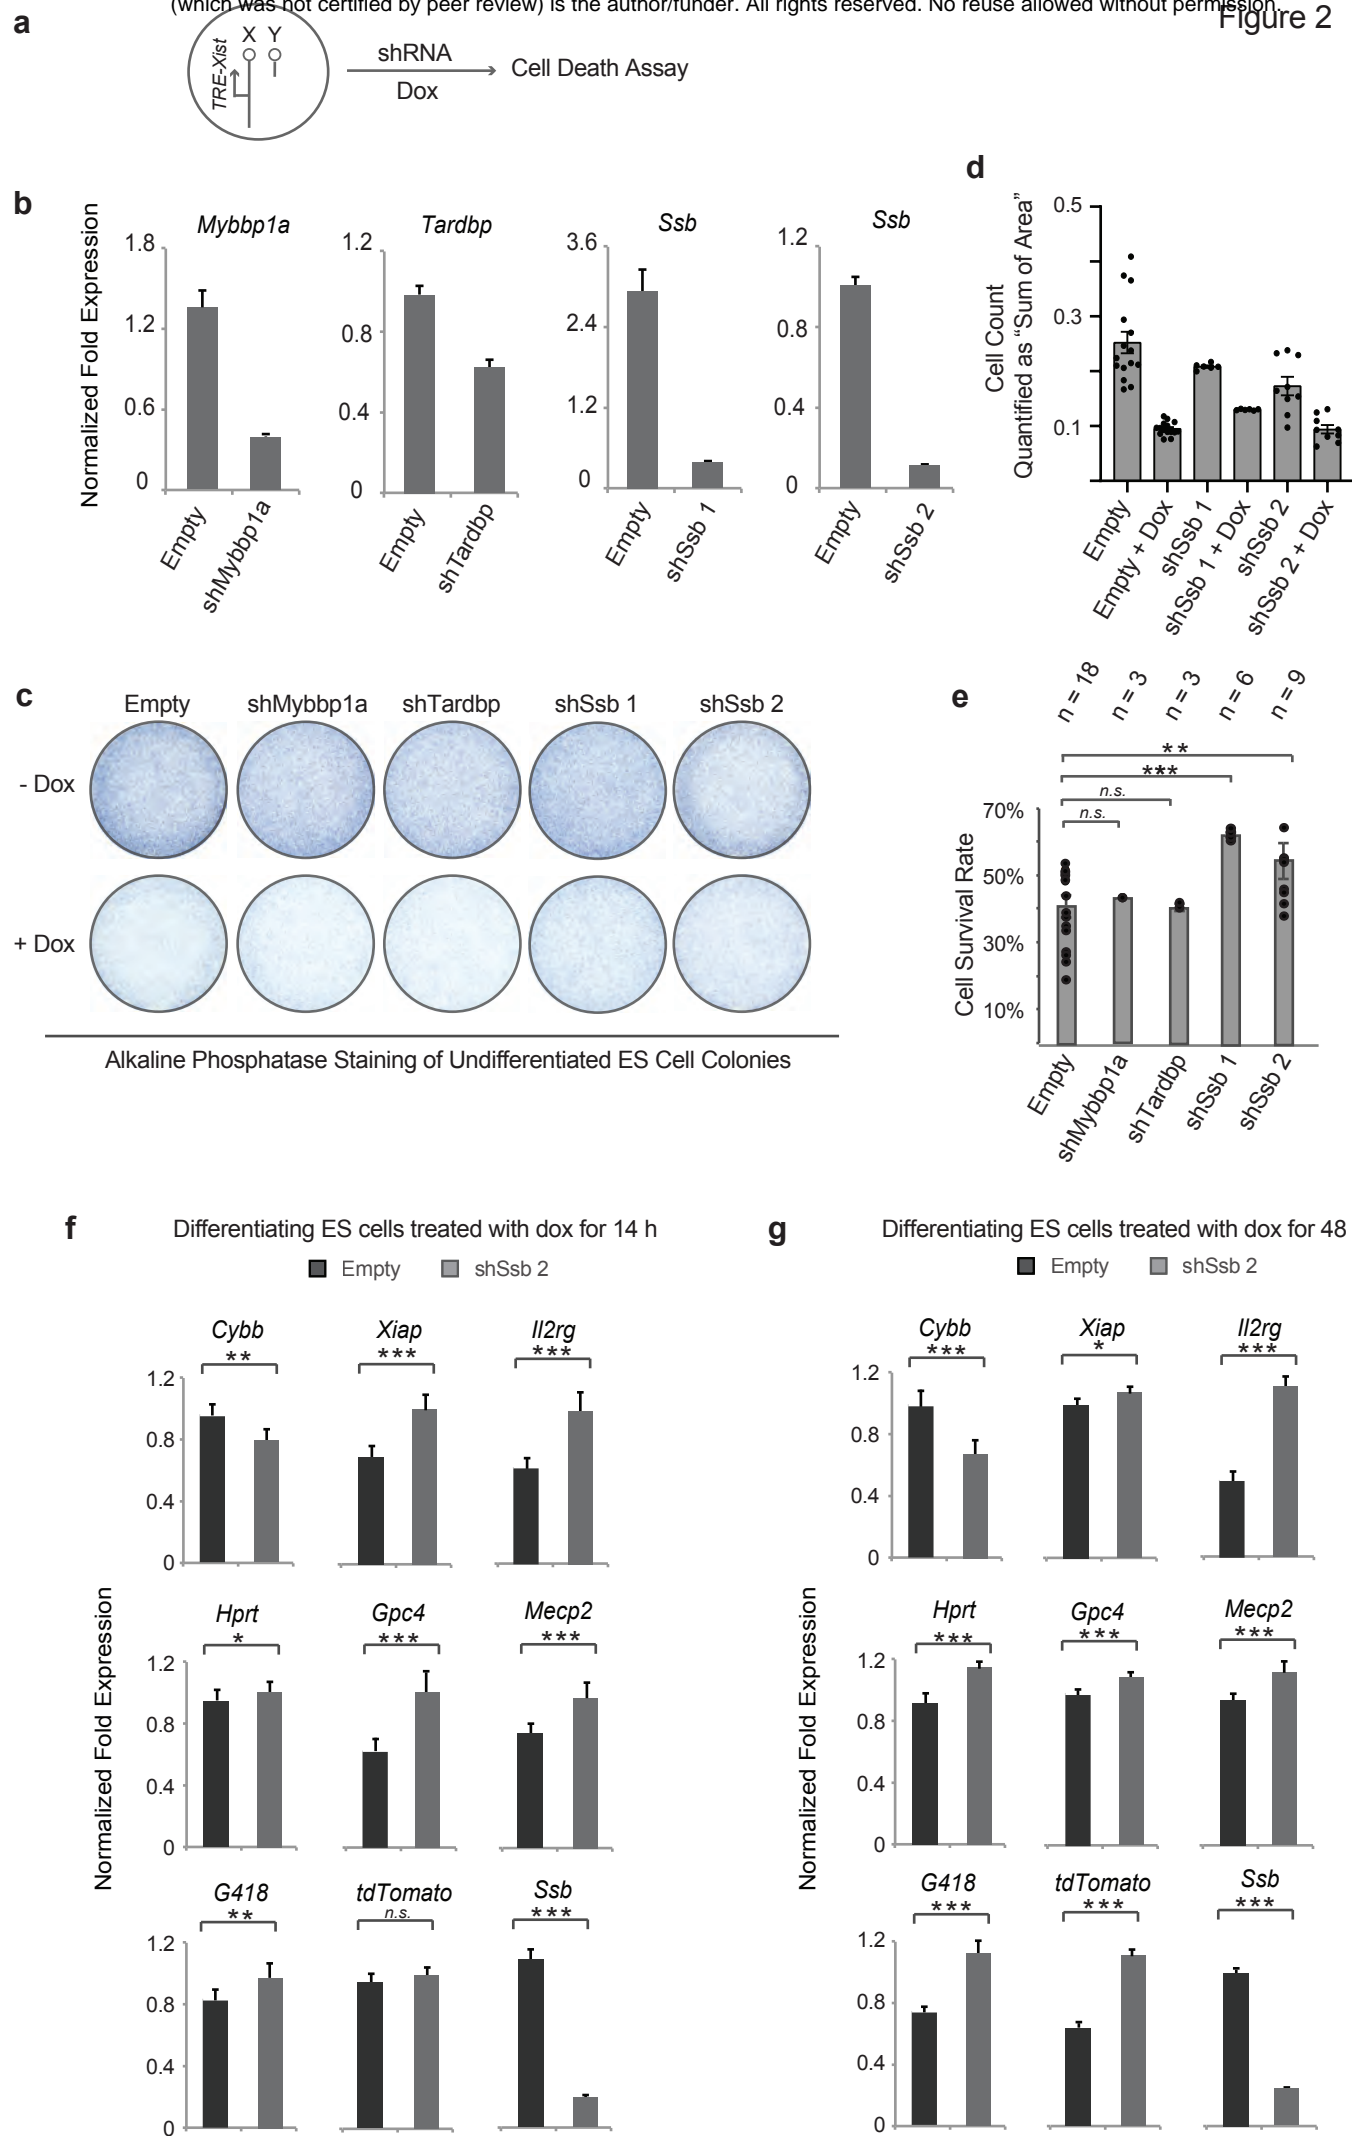

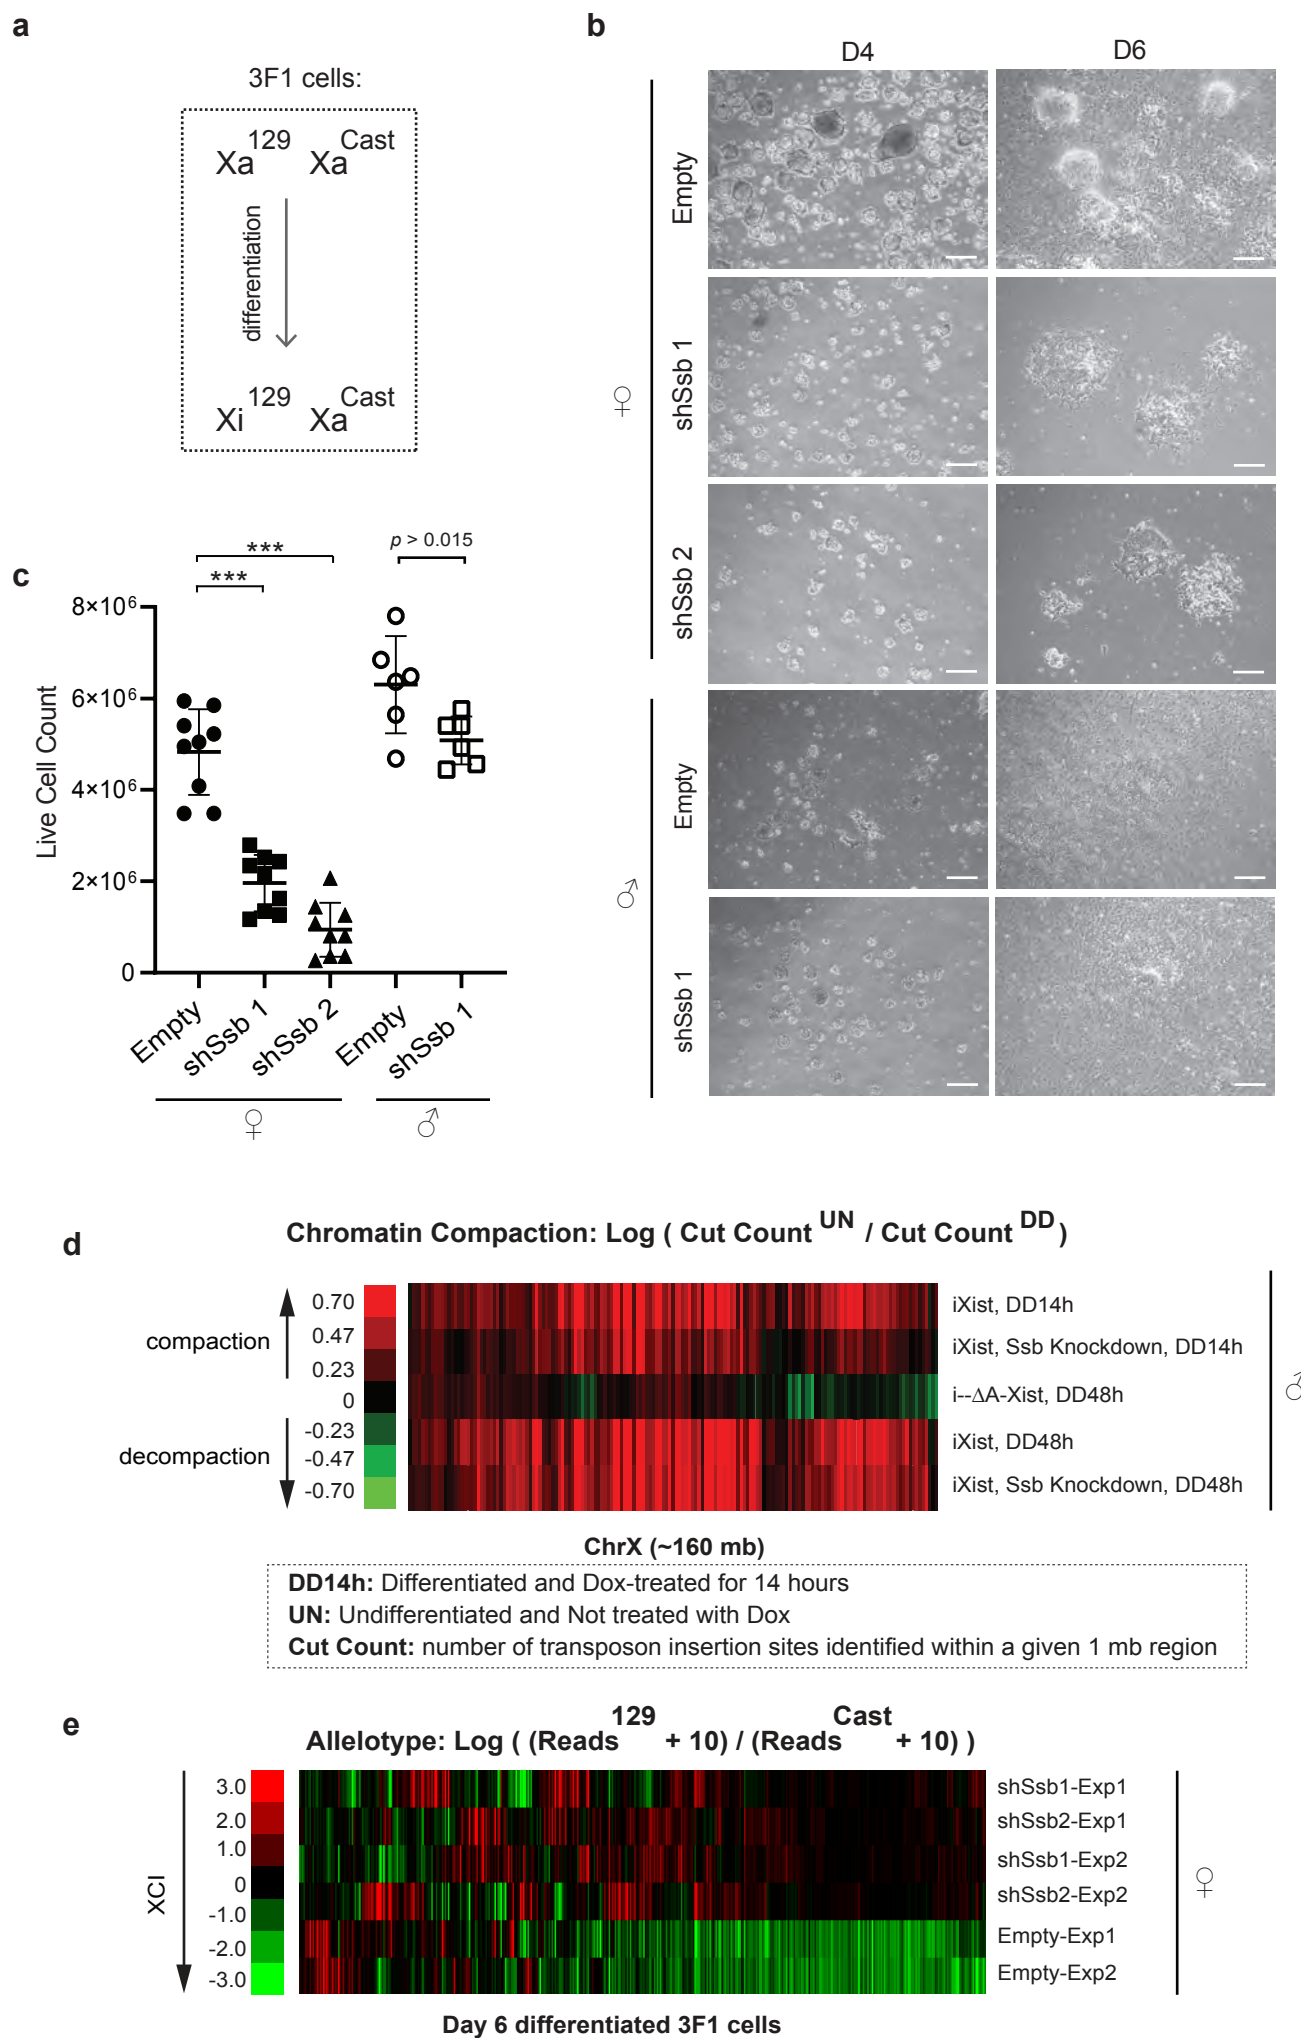



Figure 4

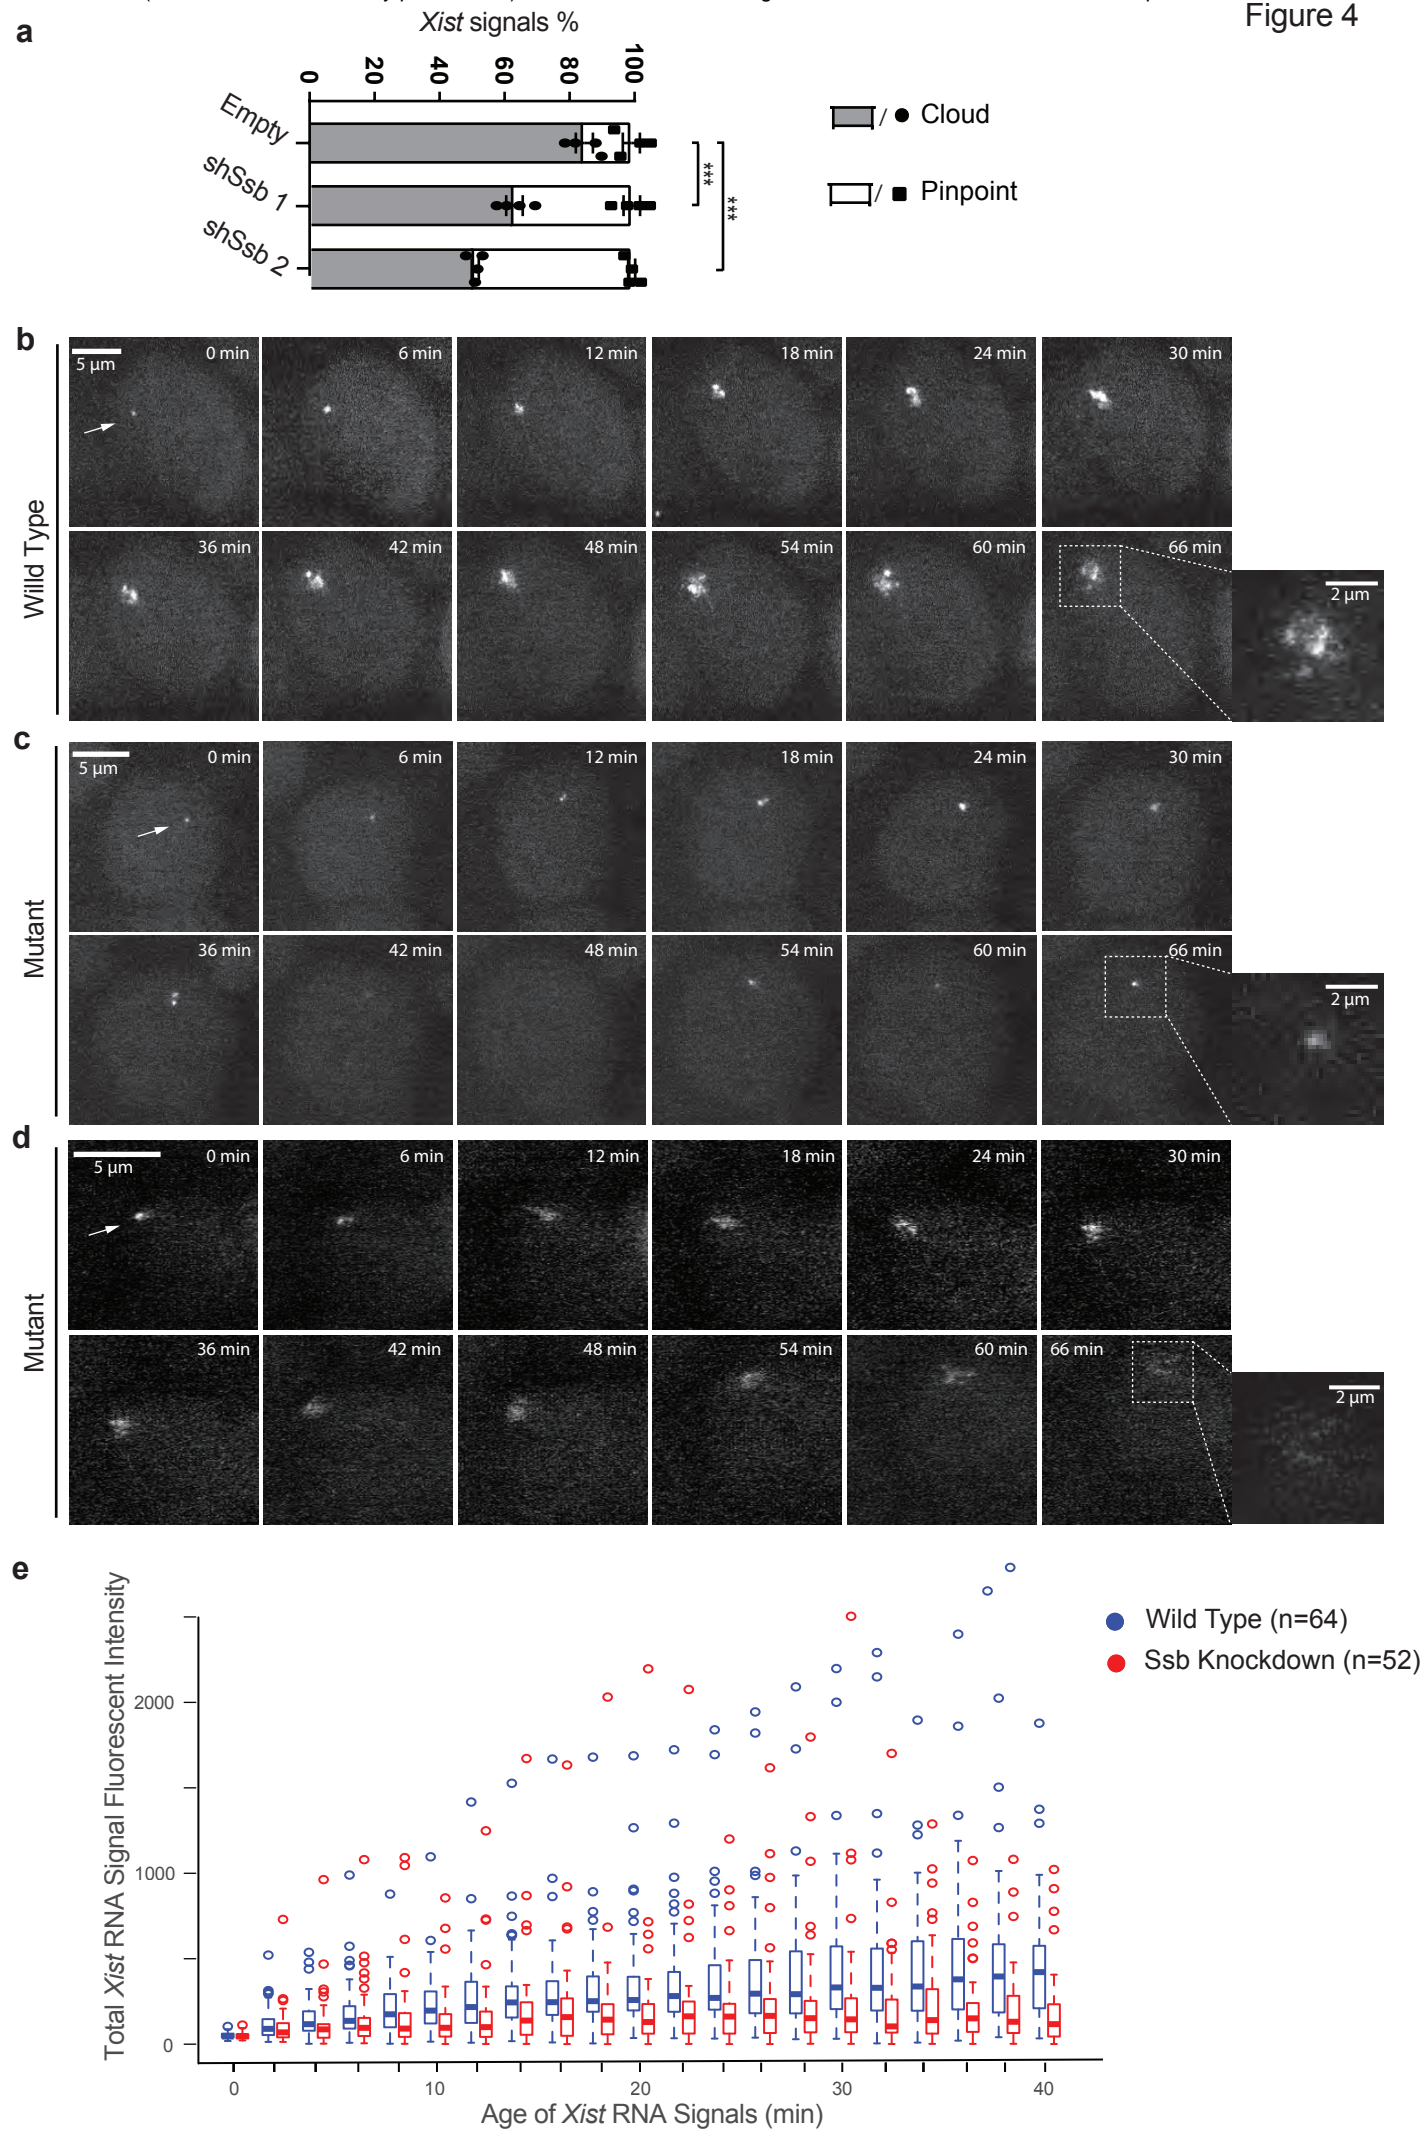



Figure 5

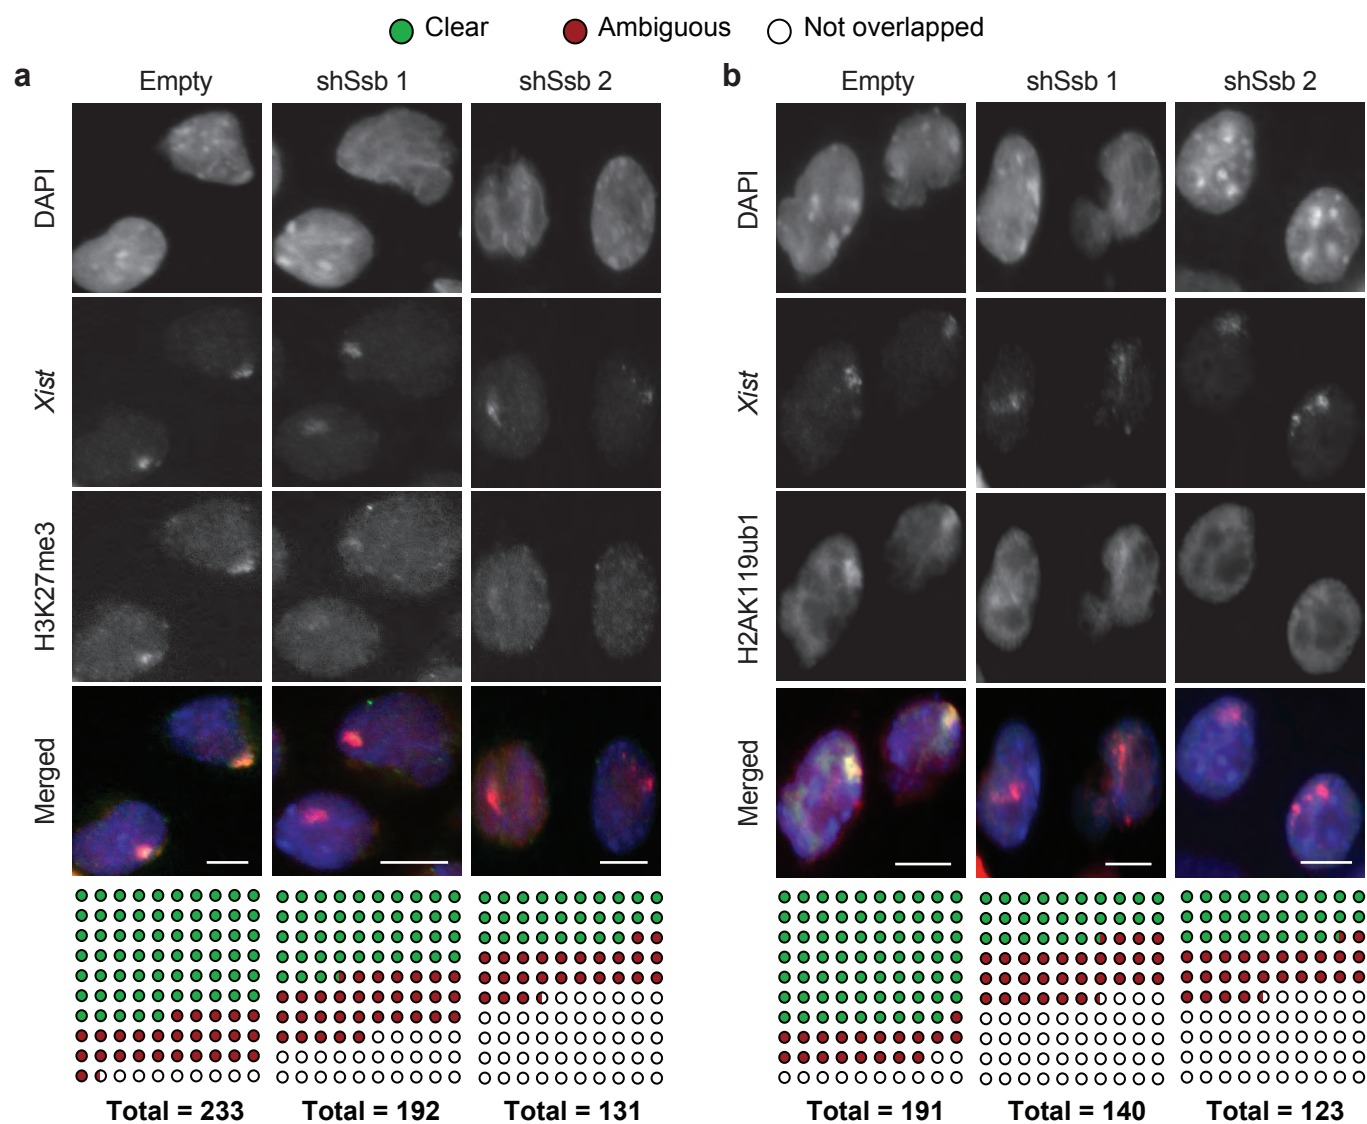

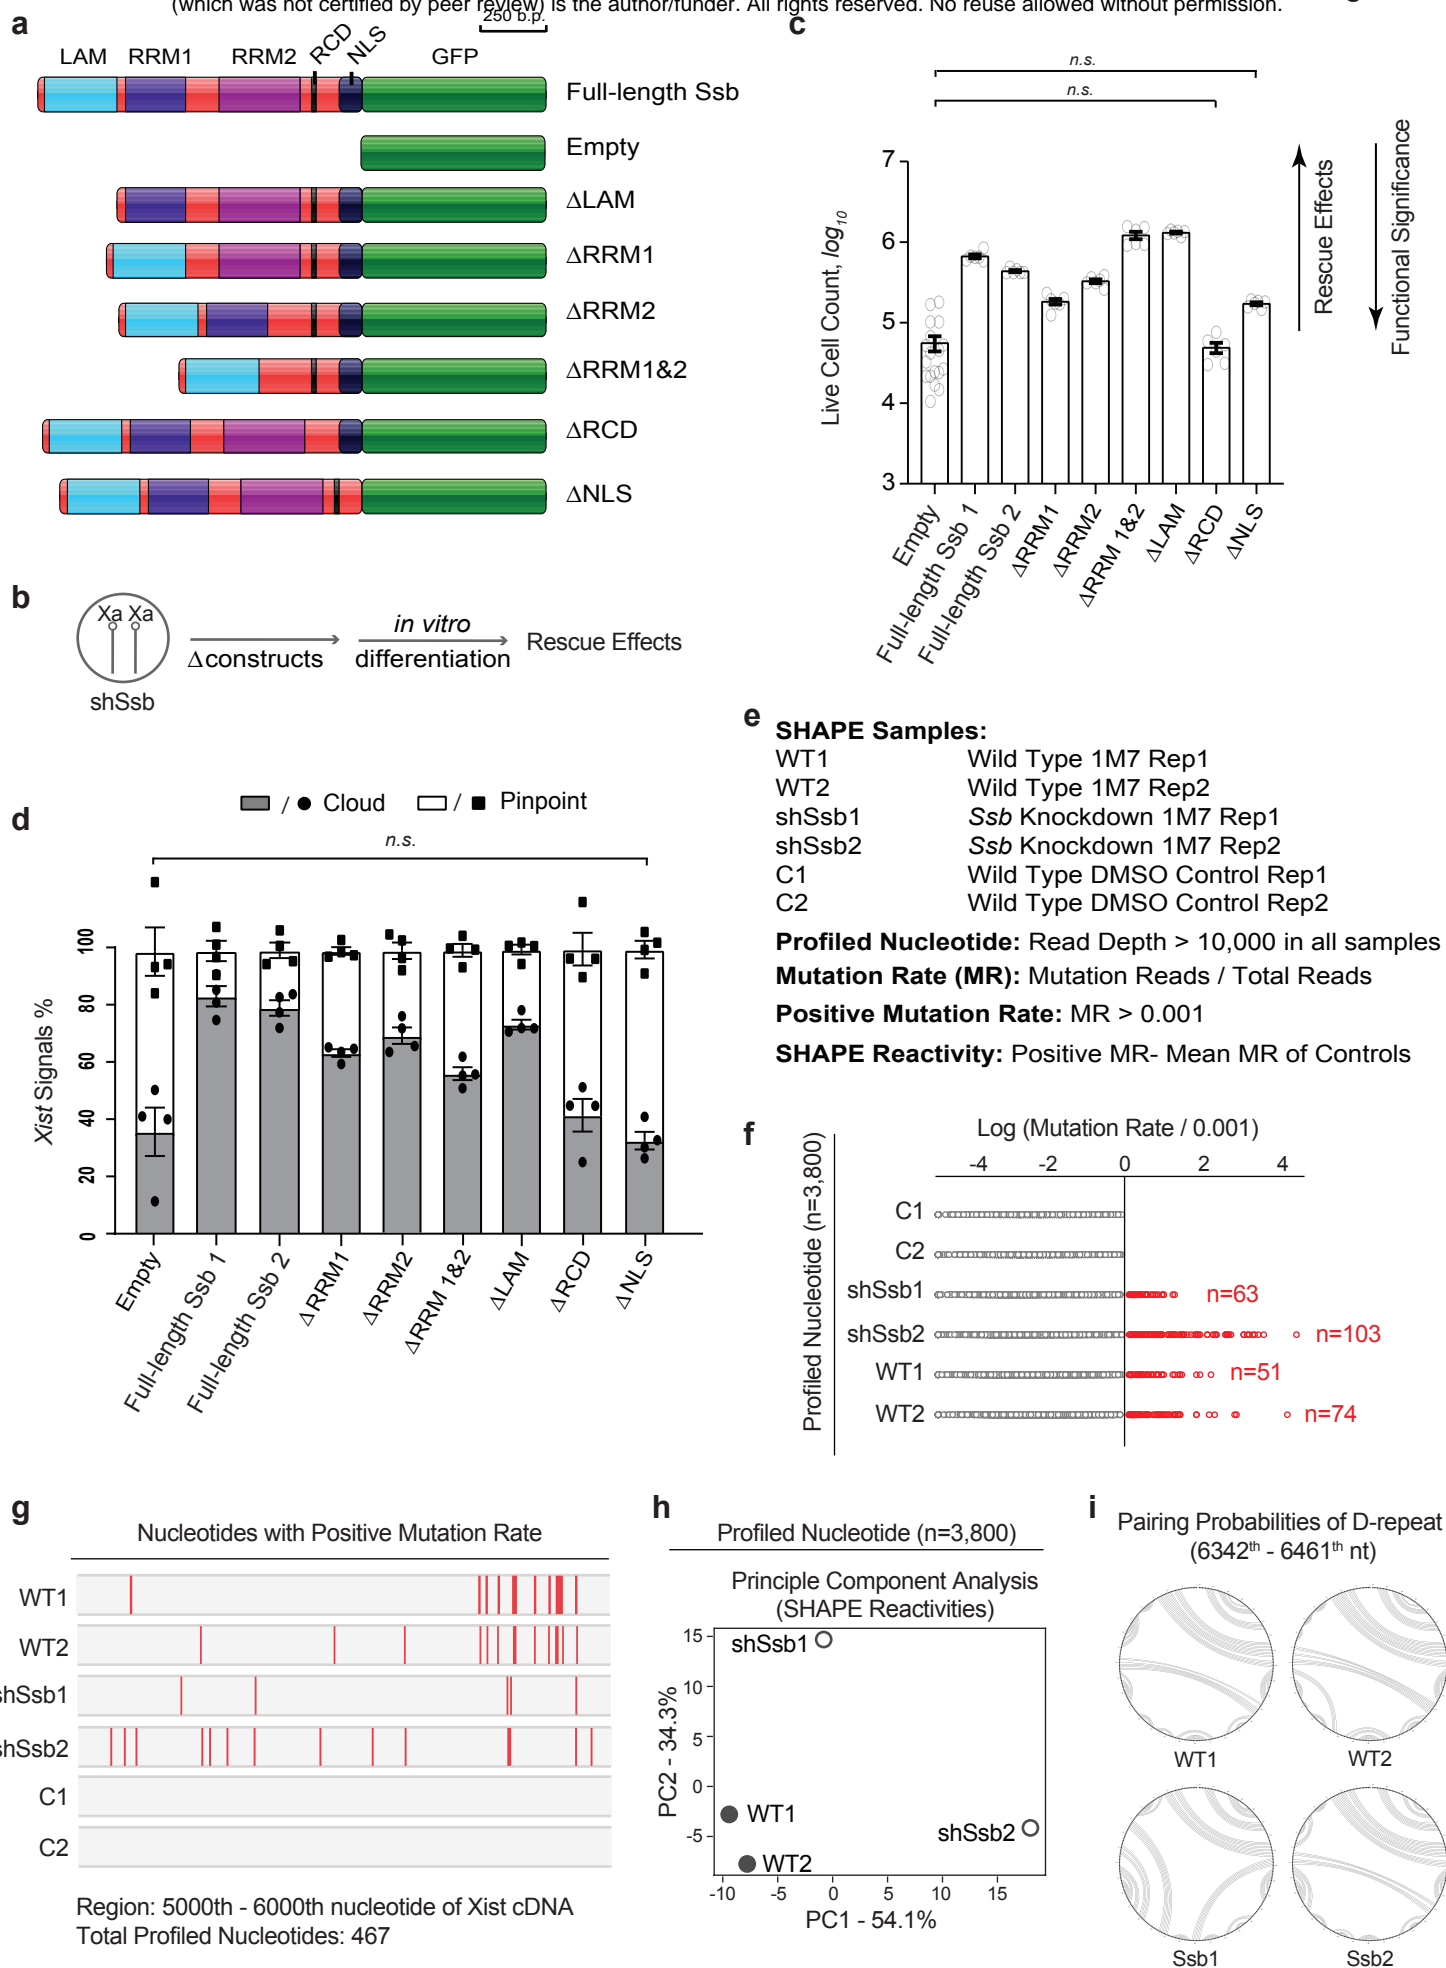

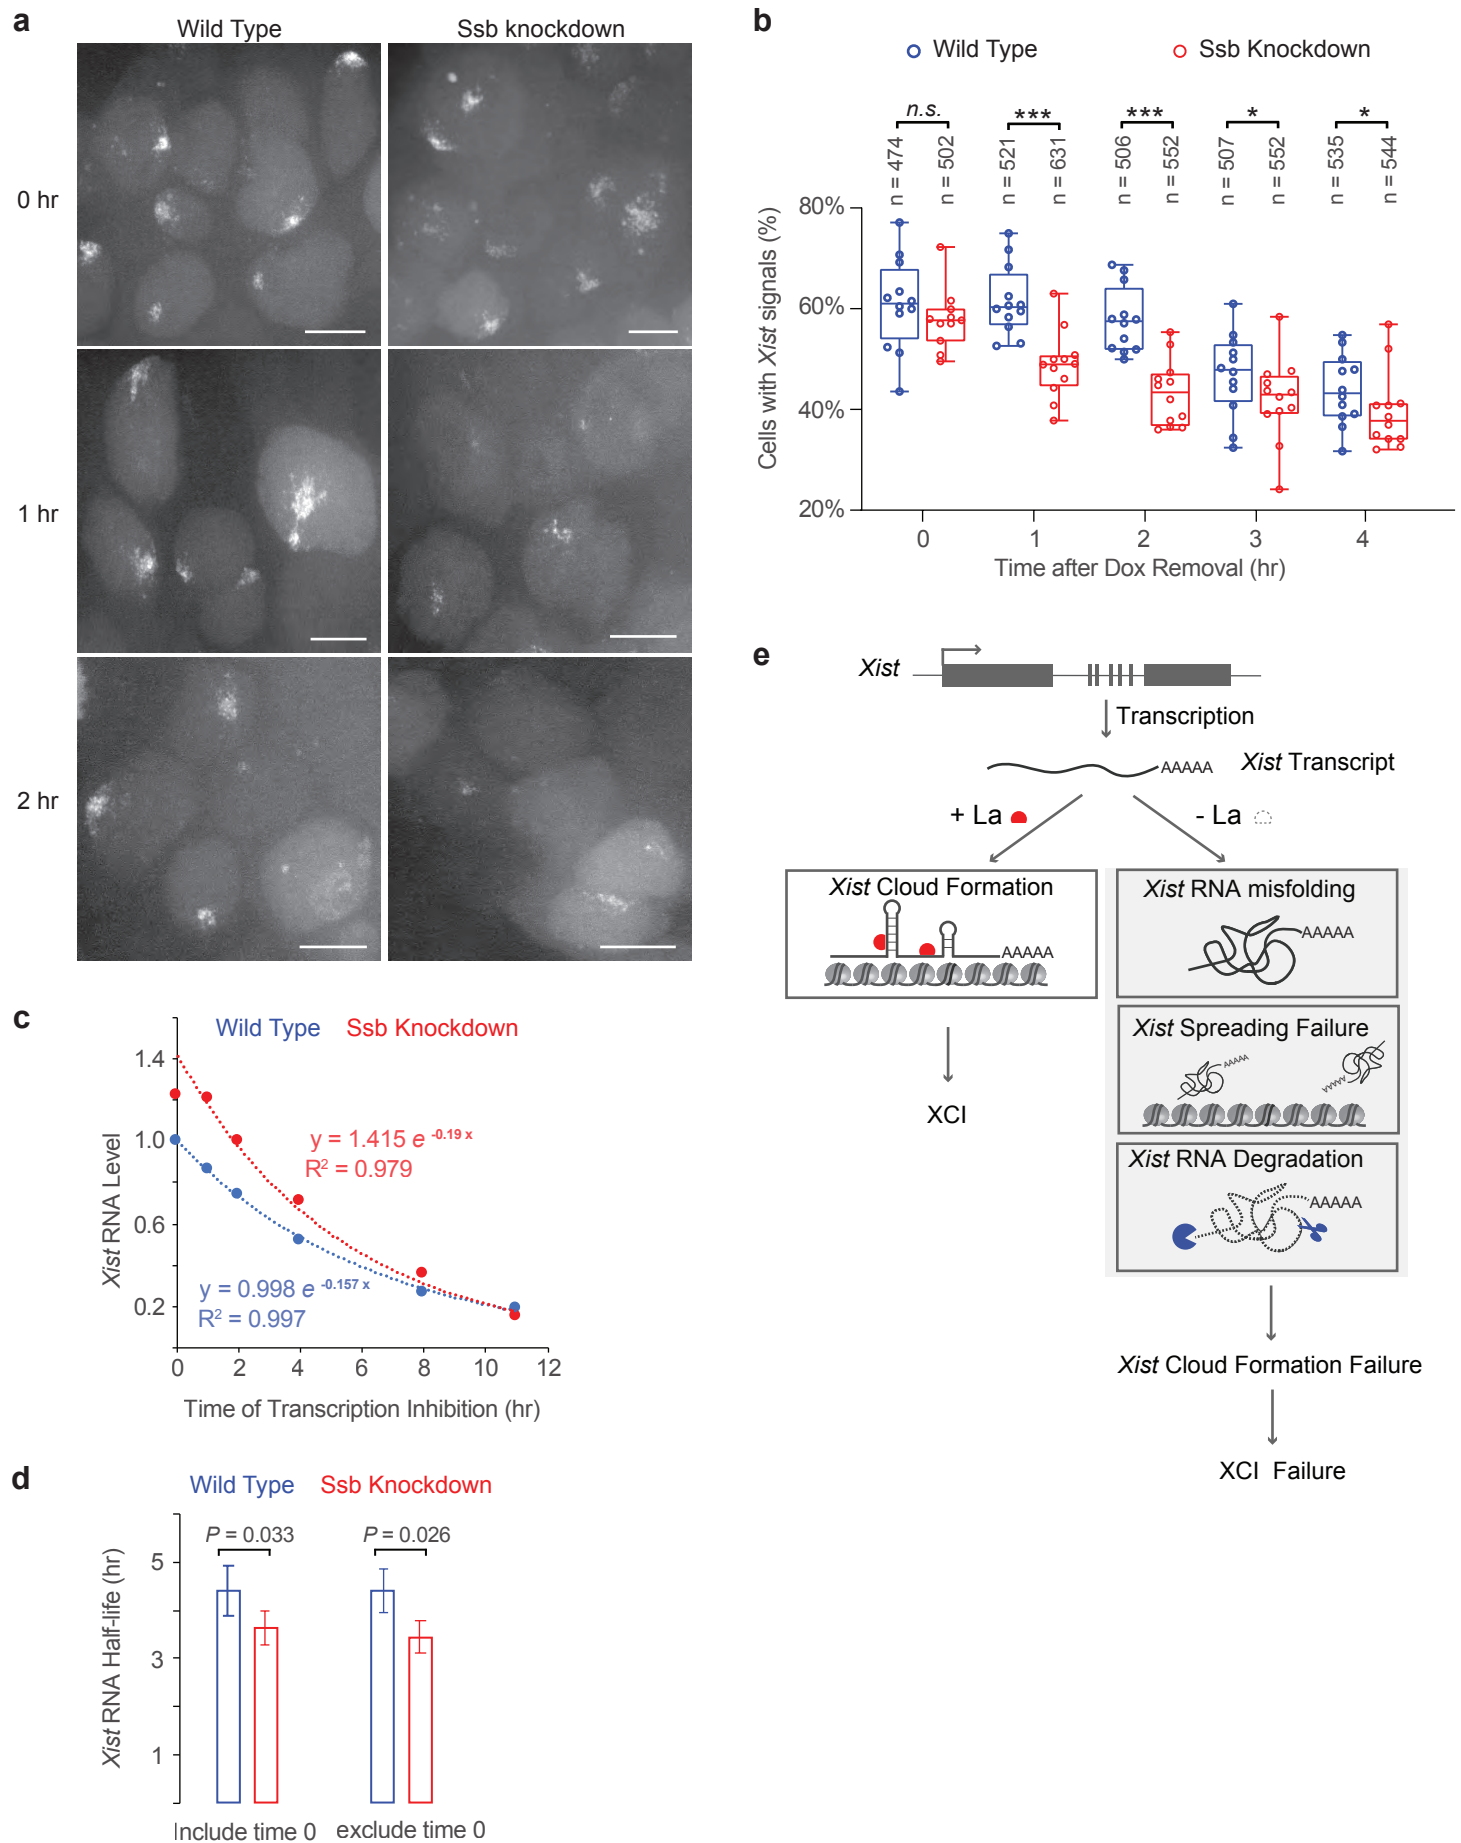

Source: https://www.biorxiv.org/content/10.1101/2020.03.07.981860v1.full.pdf
